# Supplementary material for: Multi-functional GdEuxTb1−xO3 (x = 0 to 1) nanoparticles: colour tuning optical properties, water proton spin relaxivities, and X-ray attenuation properties
Source: Royal Society of Chemistry journal article supplement (doi:10.1039/d4nr02195a), 2024-01-01
Supplement: d4nr02195a1.pdf [file d4nr02195a1.pdf]

## Supporting Information

### **Multi-functional GdEu<sub>x</sub>Tb<sub>1-x</sub>O<sub>3</sub> (x = 0 to 1) nanoparticles: colour tuning optical properties, water proton spin relaxivities, and X-ray attenuation properties**

Dejun Zhao,<sup>a</sup> Ying Liu,<sup>a</sup> Son Long Ho,<sup>a</sup> Tirusew Tegafaw,<sup>a</sup> Abdullah Khamis Ali Al Saidi,<sup>a</sup> Hansol Lee,<sup>b</sup> Dabin Ahn,<sup>b</sup> Hyunji Nam,<sup>b</sup> Ji Ae Park<sup>c</sup>, Ji-ung Yang<sup>c</sup>, Weon-Sik Chae,<sup>d</sup> Yongmin Chang<sup>\*,e</sup> and Gang Ho Lee<sup>\*,a</sup>

<sup>a</sup>Department of Chemistry, College of Natural Sciences, Kyungpook National University, Taegu 41566, South Korea

<sup>b</sup>Department of Medical & Biological Engineering, Kyungpook National University, Taegu 41944, South Korea

<sup>c</sup>Division of RI-Convergence Research, Korea Institute of Radiological & Medical Science, Seoul 01817, South Korea

<sup>d</sup>Daegu Center, Korea Basic Science Institute, Taegu 41566, South Korea

<sup>e</sup>Department of Molecular Medicine, School of Medicine, Kyungpook National University, Taegu 41944, South Korea

\*Correspondence: ychang@knu.ac.kr (Y.C.); ghlee@mail.knu.ac.kr (G.H.L.)

### (1) EDS spectra of $\text{GdEu}_x\text{Tb}_{1-x}\text{O}_3@PAA/PDA$ nanoparticles

EDS spectra of  $\text{GdEu}_x\text{Tb}_{1-x}\text{O}_3@PAA/PDA$  nanoparticles ( $x = 0, 0.1, 0.3, 0.5, 0.7, 0.9,$  and  $1$ ) confirmed the presence of Eu, Gd, and Tb within the nanoparticles (Figure S1).

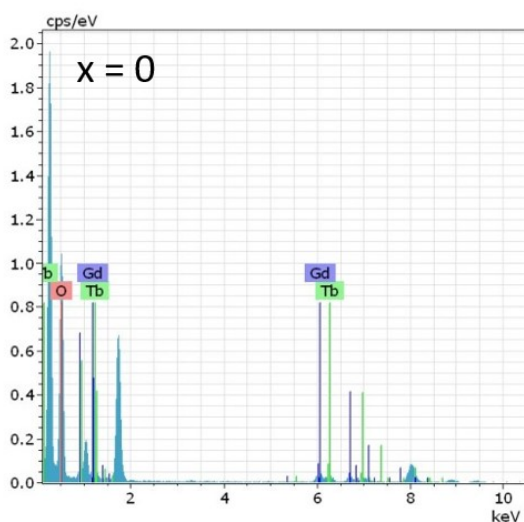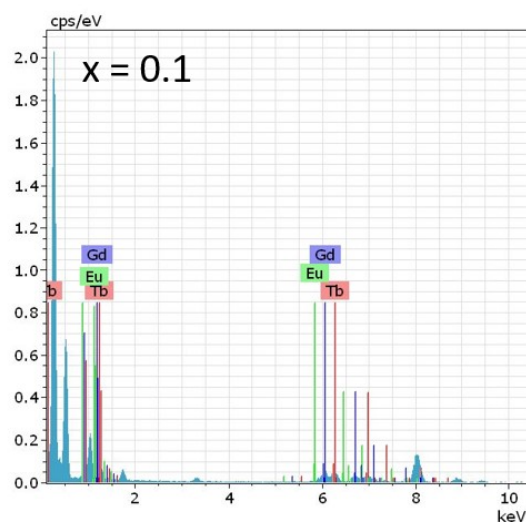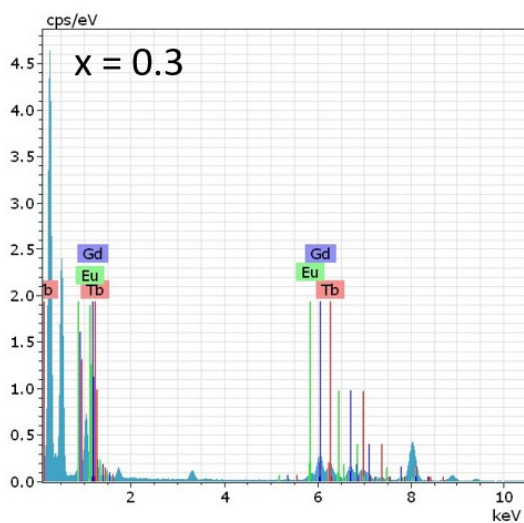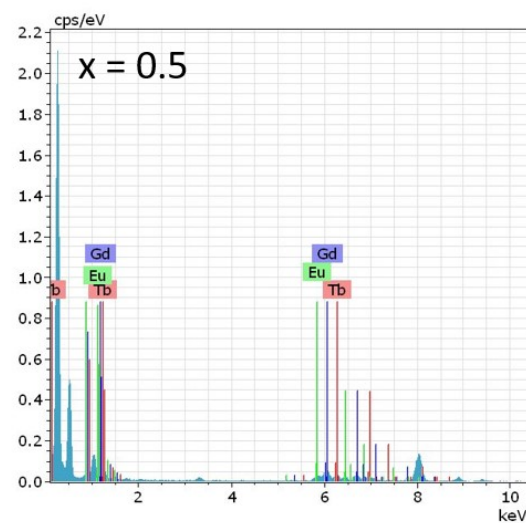

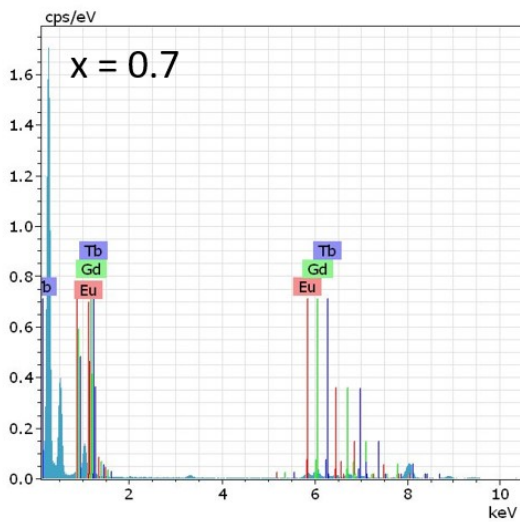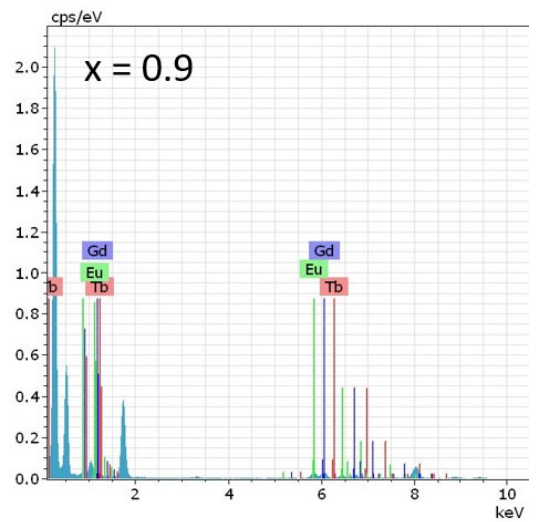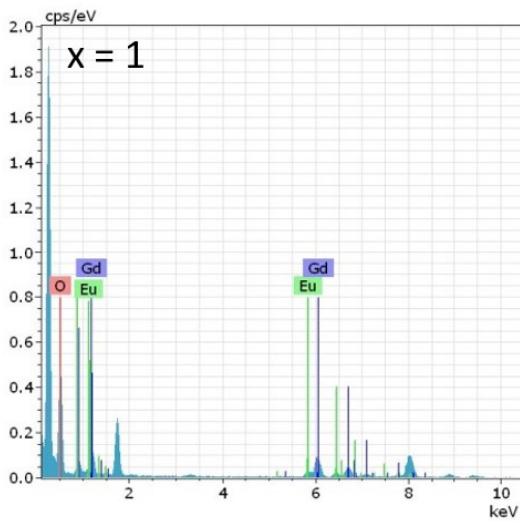

Figure S1. EDS spectra of  $\text{GdEu}_x\text{Tb}_{1-x}\text{O}_3@PAA/PDA$  nanoparticles ( $x = 0, 0.1, 0.3, 0.5, 0.7, 0.9,$  and 1).

## (2) Laser light scattering (i.e., Tyndall effect)

The laser light scattering was only observed for nanoparticle solutions, but not for triple-distilled water, proving good colloidal dispersion of the nanoparticles in aqueous media (Figure S2).

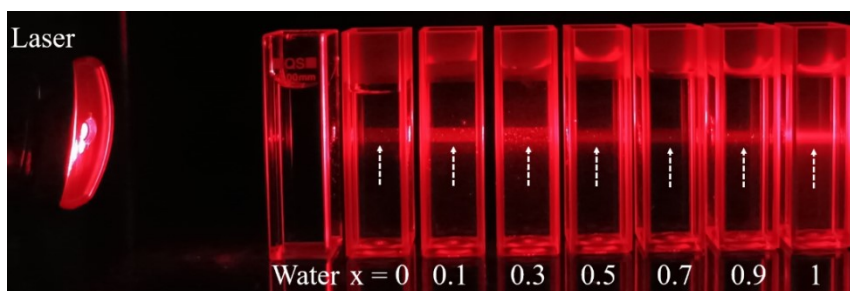

**Figure S2.** Photographs of laser light scattering (i.e., Tyndall effect) of  $\text{GdEu}_x\text{Tb}_{1-x}\text{O}_3@PAA/PDA$  nanoparticle solution samples and water as reference, showing Tyndall effect only for the nanoparticles in aqueous media ( $x = 0, 0.1, 0.3, 0.5, 0.7, 0.9,$  and  $1$ ), but not for water. The arrows indicate laser light scattering.

### (3) XRD patterns of $\text{GdEu}_x\text{Tb}_{1-x}\text{O}_3@PAA/PDA$ nanoparticles before and after TGA

XRD patterns were taken before (Figure S3a) and after (Figure S3b) TGA. All peaks after TGA could be assigned with (hkl) Miller indices of cubic structure and the peak positions were mole% average values of those of bulk  $\text{Ln}_2\text{O}_3$  ( $\text{Ln} = \text{Eu}, \text{Gd},$  and  $\text{Tb}$ ).<sup>1-3</sup> The (hkl) assignments and  $2\theta$  values of four main peaks and the estimated lattice constants are provided in Table S1.

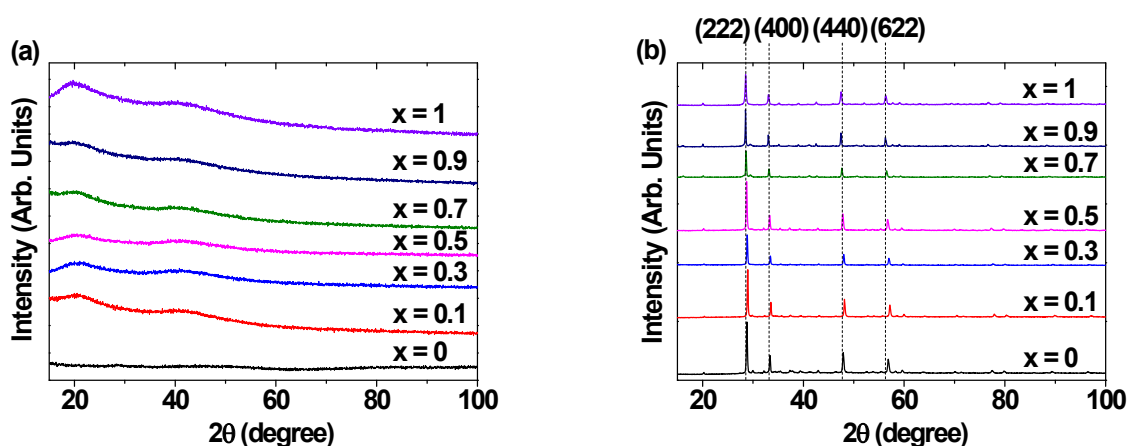

**Figure S3.** XRD patterns of  $\text{GdEu}_x\text{Tb}_{1-x}\text{O}_3@PAA/PDA$  nanoparticles ( $x = 0, 0.1, 0.3, 0.5, 0.7, 0.9,$  and  $1$ ) (a) before and (b) after TGA. All peaks after TGA could be assigned with (hkl) Miller indices of cubic structure and only the four main peaks were representatively assigned.

**Table S1.** Observed peak positions ( $2\theta$ ) of four main peaks and estimated lattice constants of  $\text{GdEu}_x\text{Tb}_{1-x}\text{O}_3@PAA/PDA$  nanoparticles after TGA.

| x | (hkl) and $2\theta$ in degree | Lattice | Mole %-averaged lattice | Ref. |
|---|-------------------------------|---------|-------------------------|------|
|---|-------------------------------|---------|-------------------------|------|

|                                | (222)  | (400)  | (440)  | (622)  | constant (Å) | constant (Å) <sup>a</sup> |            |
|--------------------------------|--------|--------|--------|--------|--------------|---------------------------|------------|
| 0                              | 28.794 | 33.370 | 47.923 | 56.874 | 10.739       | 10.790                    | This study |
| 0.1                            | 28.950 | 33.550 | 48.175 | 57.183 | 10.685       | 10.780                    | This study |
| 0.3                            | 28.853 | 33.441 | 48.021 | 56.993 | 10.718       | 10.793                    | This study |
| 0.5                            | 28.743 | 33.313 | 47.834 | 56.768 | 10.758       | 10.806                    | This study |
| 0.7                            | 28.635 | 33.186 | 47.647 | 56.542 | 10.798       | 10.819                    | This study |
| 0.9                            | 28.523 | 33.055 | 47.462 | 56.320 | 10.838       | 10.831                    | This study |
| 1                              | 28.543 | 33.081 | 47.495 | 56.359 | 10.831       | 10.828                    | This study |
| Eu <sub>2</sub> O <sub>3</sub> | 28.450 | 32.968 | 47.316 | 56.139 | 10.859       | -                         | 1          |
| Gd <sub>2</sub> O <sub>3</sub> | 28.560 | 33.096 | 47.507 | 56.371 | 10.813       | -                         | 2          |
| Tb <sub>2</sub> O <sub>3</sub> | 28.804 | 33.382 | 47.921 | 56.875 | 10.730       | -                         | 3          |

<sup>a</sup>Mole % or atomic % values are obtained from ICP-AES data listed in Table 1 in the text.

#### (4) FT-IR absorption peak frequencies and assignments

Characteristic FT-IR absorption peak frequencies, supporting the successful grafting of PAA and PDA on the nanoparticles, are provided in Table S2.

**Table S2.** Observed characteristic FT-IR absorption peak frequencies in cm<sup>-1</sup>.

| x   | O–H    |          | C–H    |          | C=O    |          | COO <sup>-</sup> antisymmetric stretching |          | COO <sup>-</sup> symmetric stretching |          |
|-----|--------|----------|--------|----------|--------|----------|-------------------------------------------|----------|---------------------------------------|----------|
|     | No PDA | With PDA | No PDA | With PDA | No PDA | With PDA | No PDA                                    | With PDA | No PDA                                | With PDA |
| PAA | 3450   |          | 2955   |          | 1689   |          | -                                         |          | -                                     |          |
| PDA | -      |          | -      |          | 1700   |          | -                                         |          | -                                     |          |
| 0   | 3305   | 3335     | 2939   | 2948     | 1709   | 1709     | 1548                                      | 1548     | 1396                                  | 1396     |
| 0.1 | 3334   | 3387     | 2948   | 2939     | 1709   | 1709     | 1548                                      | 1548     | 1396                                  | 1386     |
| 0.3 | 3315   | 3350     | 2940   | 2948     | 1709   | 1709     | 1548                                      | 1555     | 1396                                  | 1386     |
| 0.5 | 3334   | 3341     | 2939   | 2939     | 1709   | 1709     | 1548                                      | 1548     | 1396                                  | 1386     |
| 0.7 | 3315   | 3334     | 2940   | 2948     | 1709   | 1709     | 1548                                      | 1557     | 1396                                  | 1386     |
| 0.9 | 3350   | 3340     | 2949   | 2940     | 1709   | 1709     | 1548                                      | 1548     | 1390                                  | 1386     |
| 1   | 3315   | 3315     | 2948   | 2939     | 1709   | 1709     | 1540                                      | 1540     | 1396                                  | 1405     |

**Table S3.** The lanthanide ion concentrations used for measurements of colour tuning, absolute QYs, PL spectra, UV-visible absorption spectra, and lifetimes.

|     | Without PDA<br>(mM [Ln]) |         |         | With PDA<br>(mM [Ln]) |         |         |          |
|-----|--------------------------|---------|---------|-----------------------|---------|---------|----------|
|     | Gd (mM)                  | Tb (mM) | Eu (mM) | Gd (mM)               | Tb (mM) | Eu (mM) | PDA (mM) |
| 0   | 1.99                     | 2.00    | 0.00    | 1.99                  | 2.00    | 0.00    | 7.10     |
| 0.1 | 2.13                     | 1.78    | 0.22    | 2.13                  | 1.78    | 0.22    | 7.50     |
| 0.3 | 2.09                     | 1.34    | 0.66    | 2.09                  | 1.34    | 0.66    | 7.50     |
| 0.5 | 2.03                     | 0.93    | 1.07    | 2.03                  | 0.93    | 1.07    | 5.00     |
| 0.7 | 2.00                     | 0.54    | 1.46    | 2.00                  | 0.54    | 1.46    | 10.00    |
| 0.9 | 1.95                     | 0.17    | 1.83    | 1.95                  | 0.17    | 1.83    | 7.50     |
| 1   | 1.97                     | 0.00    | 2.00    | 1.97                  | 0.00    | 2.00    | 3.70     |

Ln = Eu or Gd or Tb.

#### (5) The CIE (1931) chromaticity coordinate (a,b)

The CIE (1931) chromaticity coordinates (a,b) of  $\text{GdEu}_x\text{Tb}_{1-x}\text{O}_3@\text{PAA/PDA}$  nanoparticles estimated from PL spectra in aqueous media are provided in Table S4.

**Table S4.** The CIE (1931) chromaticity coordinate (a,b) of  $\text{GdEu}_x\text{Tb}_{1-x}\text{O}_3@\text{PAA/PDA}$  nanoparticles estimated from PL spectra in aqueous media.

| x   | a      | b      | Approximate colour |
|-----|--------|--------|--------------------|
| 0   | 0.3141 | 0.5674 | Yellowish green    |
| 0.1 | 0.3542 | 0.5494 | Yellowish green    |
| 0.3 | 0.3755 | 0.5319 | Yellow green       |
| 0.5 | 0.4295 | 0.4992 | Greenish yellow    |
| 0.7 | 0.5030 | 0.4487 | Yellowish orange   |
| 0.9 | 0.5823 | 0.3975 | Orange             |
| 1   | 0.6197 | 0.3706 | Reddish orange     |

#### (6) Excitation spectra of $\text{GdEu}_x\text{Tb}_{1-x}\text{O}_3@\text{PAA/PDA}$ nanoparticles in aqueous media

The  $\lambda_{\text{ex}}$ s were determined from the most intense peaks in excitation spectra (Figure S4) except peaks from Eu [i.e., 308 (= 616/2) and 616 nm] and Tb (i.e., 545 nm).

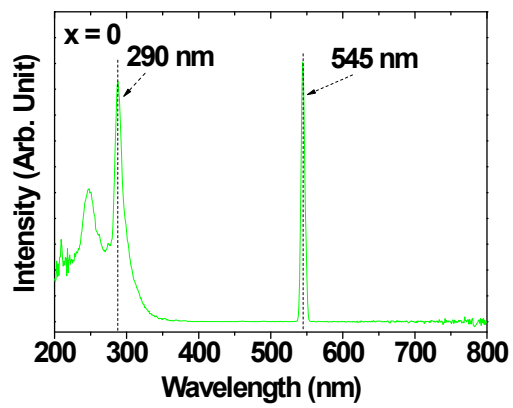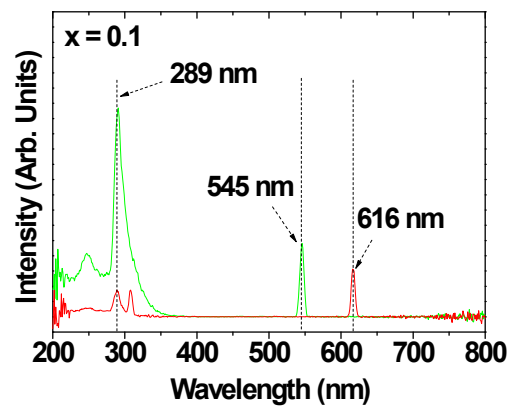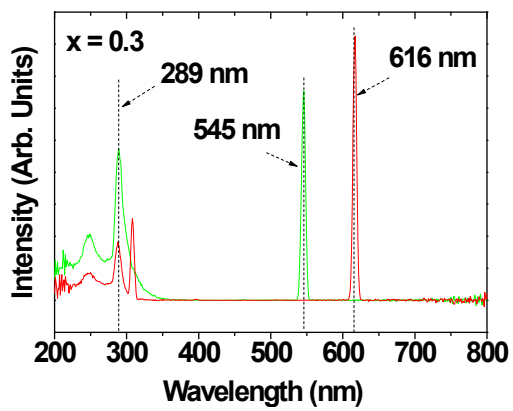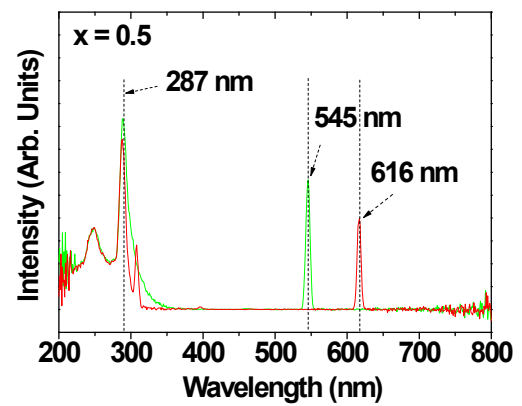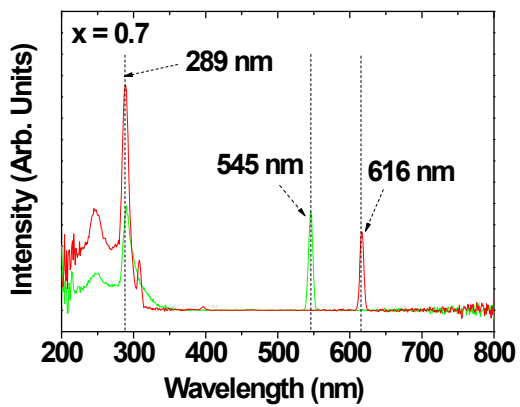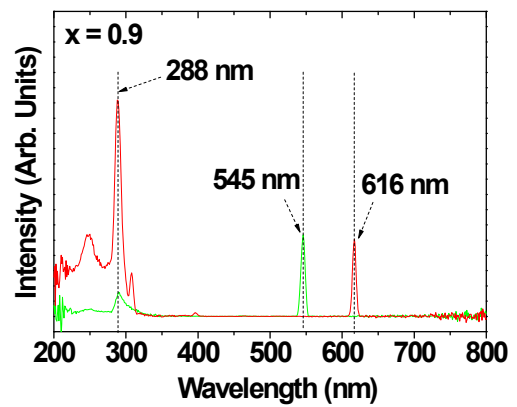

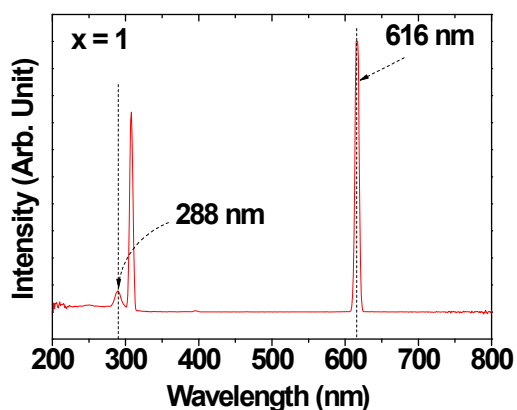

**Figure S4.** Excitation spectra of  $\text{GdEu}_x\text{Tb}_{1-x}\text{O}_3@\text{PAA/PDA}$  nanoparticles in aqueous media ( $x = 0, 0.1, 0.3, 0.5, 0.7, 0.9,$  and  $1$ ) based on  $545 \text{ nm}$  peak for Tb and  $616 \text{ nm}$  peak for Eu.

(7) UV-visible absorption spectrum of PDA ( $0.1 \text{ mM}$ ) and  $\text{GdEu}_x\text{Tb}_{1-x}\text{O}_3@\text{PAA/PDA}$  nanoparticles ( $x = 0$  and  $1$ ) in aqueous media

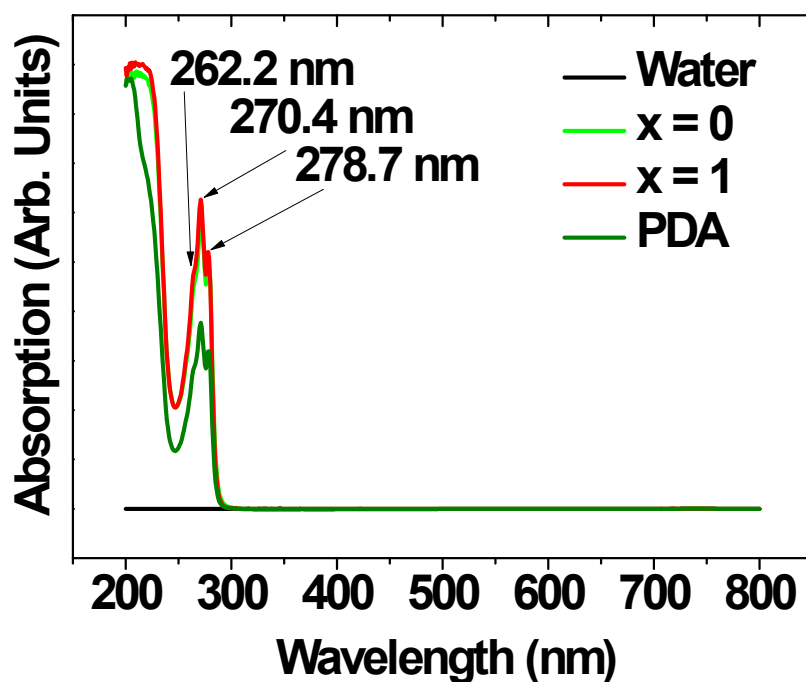

**Figure S5.** UV-visible absorption spectra of PDA ( $0.1 \text{ mM}$ ) and  $\text{GdEu}_x\text{Tb}_{1-x}\text{O}_3@\text{PAA/PDA}$  nanoparticles ( $x = 0$  and  $1$ ) in aqueous media and water as reference.



**(8) The transition wavelengths and peak assignments in PL spectra**

**Table S5.** The transition wavelengths and peak assignments of GdEu<sub>x</sub>Tb<sub>1-x</sub>O<sub>3</sub>@PAA/PDA nanoparticles (x = 0, 0.1, 0.3, 0.5, 0.7, 0.9, and 1) in PL spectra in aqueous media.

| x   | Tb<br>( <sup>5</sup> D <sub>4</sub> → <sup>7</sup> F <sub>6</sub> ) | Tb<br>( <sup>5</sup> D <sub>4</sub> → <sup>7</sup> F <sub>5</sub> ) | Tb<br>( <sup>5</sup> D <sub>4</sub> → <sup>7</sup> F <sub>4</sub> ) | Tb<br>( <sup>5</sup> D <sub>4</sub> → <sup>7</sup> F <sub>3</sub> ) | Eu<br>( <sup>5</sup> D <sub>1</sub> → <sup>7</sup> F <sub>1</sub> ) | Eu<br>( <sup>5</sup> D <sub>1</sub> → <sup>7</sup> F <sub>2</sub> ) | Eu<br>( <sup>5</sup> D <sub>0</sub> → <sup>7</sup> F <sub>0</sub> ) | Eu<br>( <sup>5</sup> D <sub>0</sub> → <sup>7</sup> F <sub>1</sub> ) | Eu<br>( <sup>5</sup> D <sub>0</sub> → <sup>7</sup> F <sub>2</sub> ) | Eu<br>( <sup>5</sup> D <sub>0</sub> → <sup>7</sup> F <sub>3</sub> ) | Eu<br>( <sup>5</sup> D <sub>0</sub> → <sup>7</sup> F <sub>4</sub> ) |
|-----|---------------------------------------------------------------------|---------------------------------------------------------------------|---------------------------------------------------------------------|---------------------------------------------------------------------|---------------------------------------------------------------------|---------------------------------------------------------------------|---------------------------------------------------------------------|---------------------------------------------------------------------|---------------------------------------------------------------------|---------------------------------------------------------------------|---------------------------------------------------------------------|
| 0   | 490                                                                 | 545                                                                 | 583                                                                 | 622                                                                 | -                                                                   | -                                                                   | -                                                                   | -                                                                   | -                                                                   | -                                                                   | -                                                                   |
| 0.1 | 490                                                                 | 545                                                                 | 583                                                                 | 622                                                                 | -                                                                   | -                                                                   | -                                                                   | -                                                                   | 615                                                                 | -                                                                   | -                                                                   |
| 0.3 | 490                                                                 | 545                                                                 | 583                                                                 | 622                                                                 | -                                                                   | -                                                                   | -                                                                   | -                                                                   | 615                                                                 | -                                                                   | 694                                                                 |
| 0.5 | 490                                                                 | 545                                                                 | 583                                                                 | -                                                                   | -                                                                   | -                                                                   | -                                                                   | 593                                                                 | 615                                                                 | -                                                                   | 694                                                                 |
| 0.7 | 490                                                                 | 545                                                                 | 583                                                                 | -                                                                   | -                                                                   | -                                                                   | -                                                                   | 593                                                                 | 615                                                                 | -                                                                   | 694                                                                 |
| 0.9 | 490                                                                 | 545                                                                 | 582                                                                 | -                                                                   | -                                                                   | -                                                                   | -                                                                   | 593                                                                 | 615                                                                 | -                                                                   | 694                                                                 |
| 1   | -                                                                   | -                                                                   | -                                                                   | -                                                                   | 537                                                                 | 556                                                                 | 583                                                                 | 593                                                                 | 615                                                                 | 650                                                                 | 694                                                                 |

**(9) The energy transfer efficiency ( $\eta_{ET}$ ) from  $Tb^{3+}$  to  $Eu^{3+}$  in  $GdEu_xTb_{1-x}O_3@PAA/PDA$  nanoparticles ( $x = 0.1, 0.3, 0.5, 0.7,$  and  $0.9$ )**

The  $\eta_{ET}$  values were estimated using the lifetimes  $\tau$ .

$$\eta_{ET} = 1 - \tau_x/\tau_0, \quad x = 0.1 \text{ to } 0.9$$

The obtained  $\eta_{ET}$  values are provided in Table S6 and plotted in Figure S6.

**Table S6.** The energy transfer efficiency ( $\eta_{ET}$ ) from  $Tb^{3+}$  to  $Eu^{3+}$  in  $GdEu_xTb_{1-x}O_3@PAA/PDA$  nanoparticles ( $x = 0.1, 0.3, 0.5, 0.7,$  and  $0.9$ ).

| x   | $\eta_{ET}$ |
|-----|-------------|
| 0   | -           |
| 0.1 | 0.218       |
| 0.3 | 0.339       |
| 0.5 | 0.260       |
| 0.7 | 0.264       |
| 0.9 | 0.228       |
| 1   | -           |

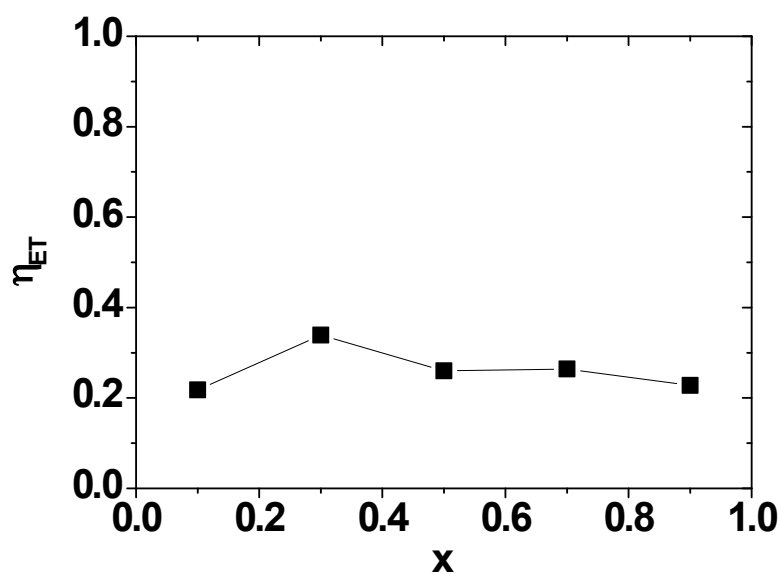

**Figure S6.** Plot of the energy transfer efficiency ( $\eta_{ET}$ ) from  $Tb^{3+}$  to  $Eu^{3+}$  in  $GdEu_xTb_{1-x}O_3@PAA/PDA$  nanoparticles ( $x = 0.1, 0.3, 0.5, 0.7,$  and  $0.9$ ).

## References

- 1  $\text{Eu}_2\text{O}_3$ , 1977 JCPDS-International Centre for Diffraction Data, card no. 43-1008, the lattice constant = 10.859 Å.
- 2  $\text{Gd}_2\text{O}_3$ , 1977 JCPDS-International Centre for Diffraction Data, card no. 43-1014, the lattice constant = 10.813 Å.
- 3  $\text{Tb}_2\text{O}_3$ , 1977 JCPDS-International Centre for Diffraction Data, card no. 43-1032, the lattice constant = 10.730 Å.
